# Supplementary material for: Optimized Rhodamine B labeled mesoporous silica nanoparticles as fluorescent scaffolds for the immobilization of photosensitizers: a theranostic platform for optical imaging and photodynamic therapy
Source: Royal Society of Chemistry journal article supplement (doi:10.1039/c6cp00906a), 2016-01-01
Supplement: c6cp00906a1.pdf [file c6cp00906a1.pdf]

**Electronic Supplementary information for**

**Optimized Rhodamine B labeled mesoporous silica nanoparticles as  
fluorescent scaffold for the immobilization of Photosensitizer: a  
theranostic platform for optical imaging and photodynamic therapy**

by B. Martins Estevão<sup>a,b</sup>, I. Miletto<sup>a\*</sup>, L. Marchese<sup>a</sup>, E. Gianotti<sup>a</sup>

- a. Department of Science and Technological Innovation and Nano-SiSTeMI Centre, Università del Piemonte Orientale, Viale T. Michel 11, 15121 Alessandria, Italy. Phone: +30 0131 360251 E-mail: [ivana.miletto@uniupo.it](mailto:ivana.miletto@uniupo.it)
- b. Nucleos Research of Photodynamic Therapy, Chemistry Department, State University of Maringá, Av. Colombo 5.790, 87020-900, Maringá, Paraná, Brazil

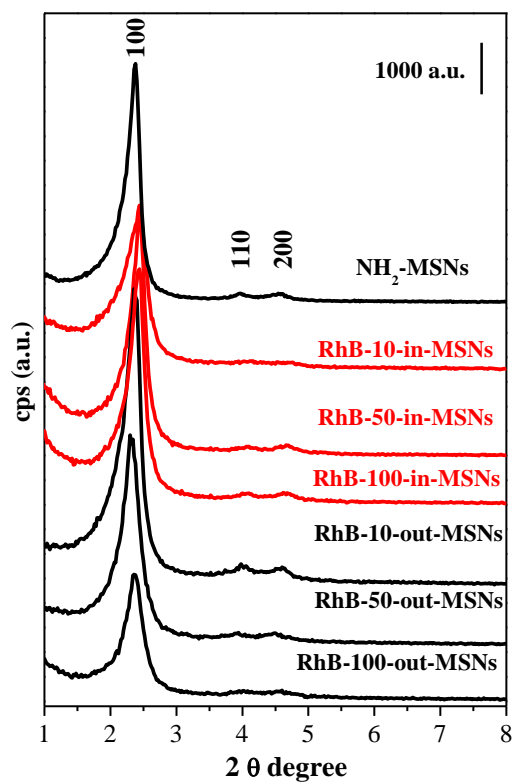

**Figure S1** - XRD patterns of RhB-MSNs with different RhB loading. The XRD pattern of NH<sub>2</sub>-MSNs, after CTAB removal, is also reported for comparison.

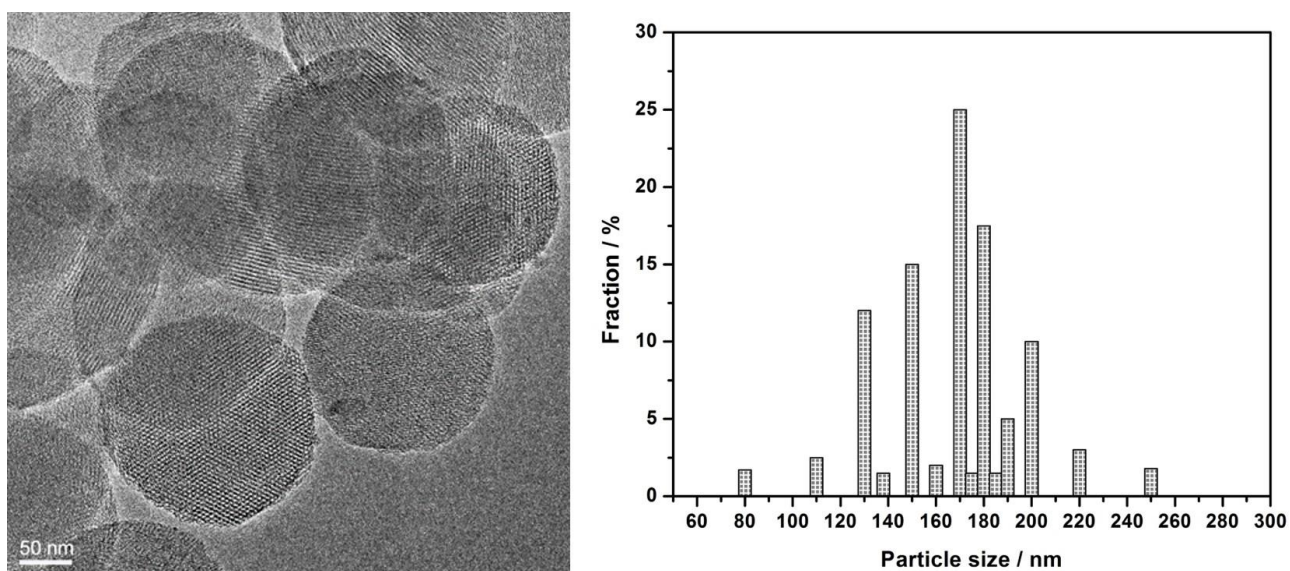

**Figure S2** – HRTEM images of RhB-MSNs and particles size distribution

**Table S1** – Average particle size obtained by DLS

| SAMPLE                | Average diameter (nm) |
|-----------------------|-----------------------|
| NH <sub>2</sub> -MSNs | 181±18                |
| RhB-10-in-MSNs        | 195±23                |
| RhB-50-in-MSNs        | 207±19                |
| RhB-100-in-MSNs       | 219±35                |
| RhB-10-out-MSNs       | 198±37                |
| RhB-50-out-MSNs       | 215±35                |
| RhB-100-out-MSNs      | 206±20                |

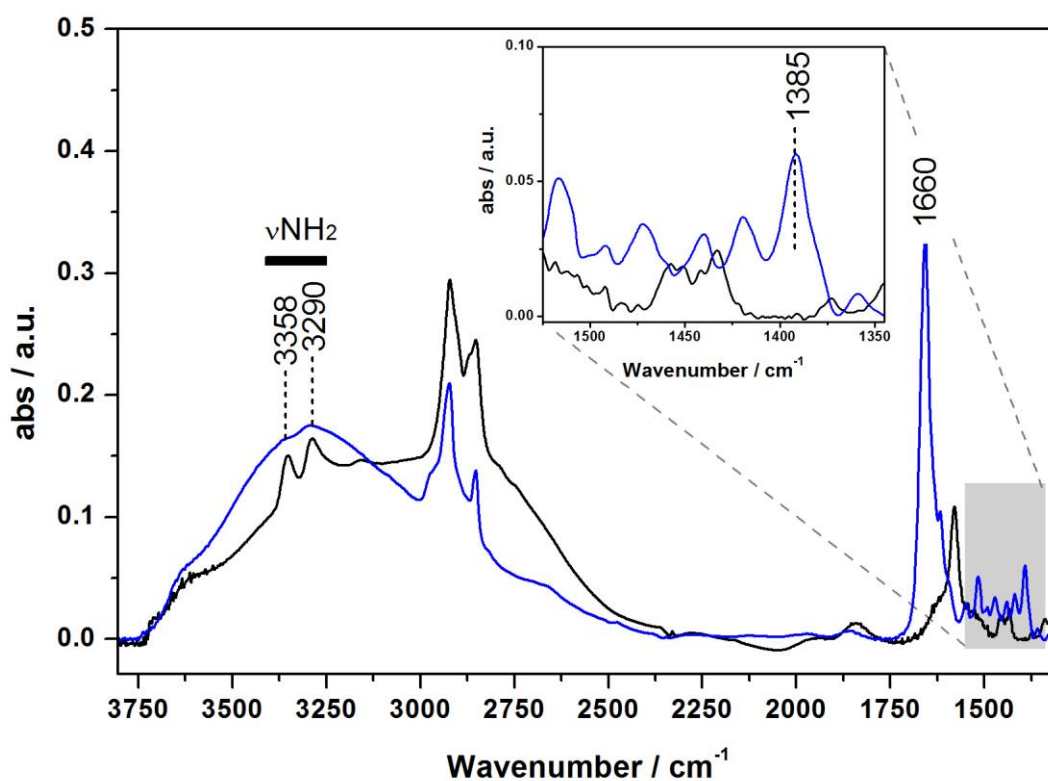

**Figure S3** – FTIR spectra of NH<sub>2</sub>-MSNs (black curve) and RhB-100-in-MSNs (blue curve)

**Table S2.** Textural properties of RhB-MSNs with different RhB loadings.

|                 | <b>SS<sub>ABET</sub> (m<sup>2</sup>g<sup>-1</sup>)</b> | <b>d<sub>DFT</sub> (Å)</b> | <b>Pore Volume (cm<sup>3</sup> g<sup>-1</sup>)</b> |
|-----------------|--------------------------------------------------------|----------------------------|----------------------------------------------------|
| RhB-10-in-MSNs  | 1235                                                   | 37.7                       | 1.072                                              |
| RhB-50-in-MSNs  | 1125                                                   | 36.2                       | 1.015                                              |
| RhB-100-in-MSNs | 1079                                                   | 35.3                       | 0.956                                              |

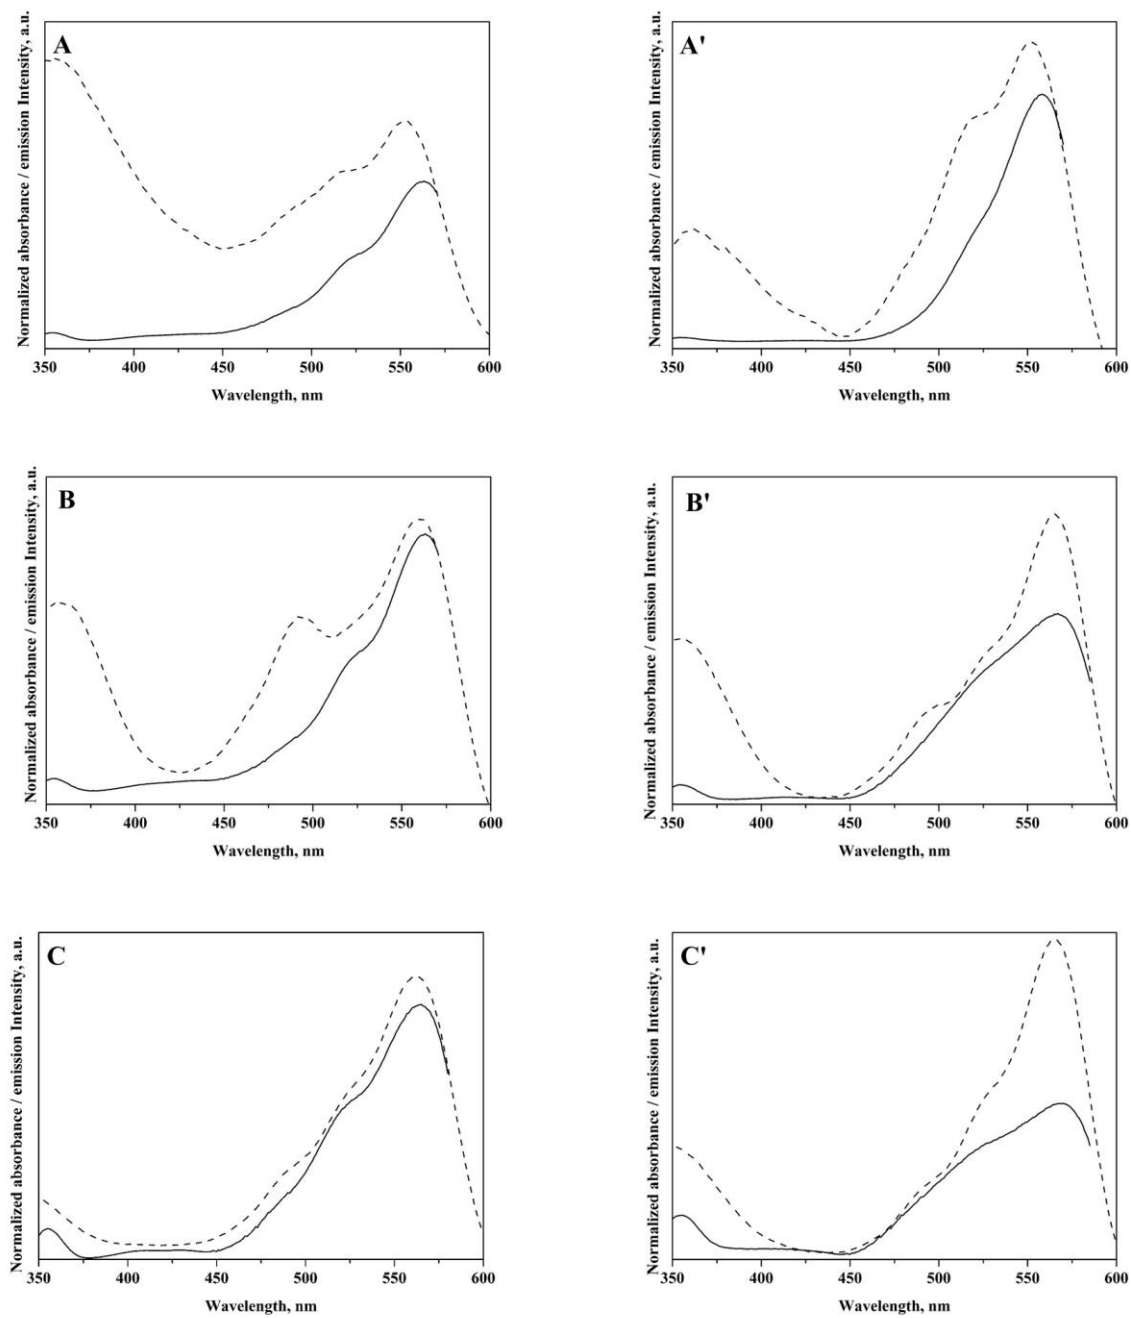

**Figure S4** – DR UV-Vis (dashed lines) and excitation (solid lines) spectra of RhB-MSNs in solid form. RhB-10-in-MSNs (A), RhB-50-in-MSNs (B), RhB-100-in-MSNs (C), RhB-10-out-MSNs (A'), RhB-50-out-MSNs (B'), RhB-100-out-MSNs (C').

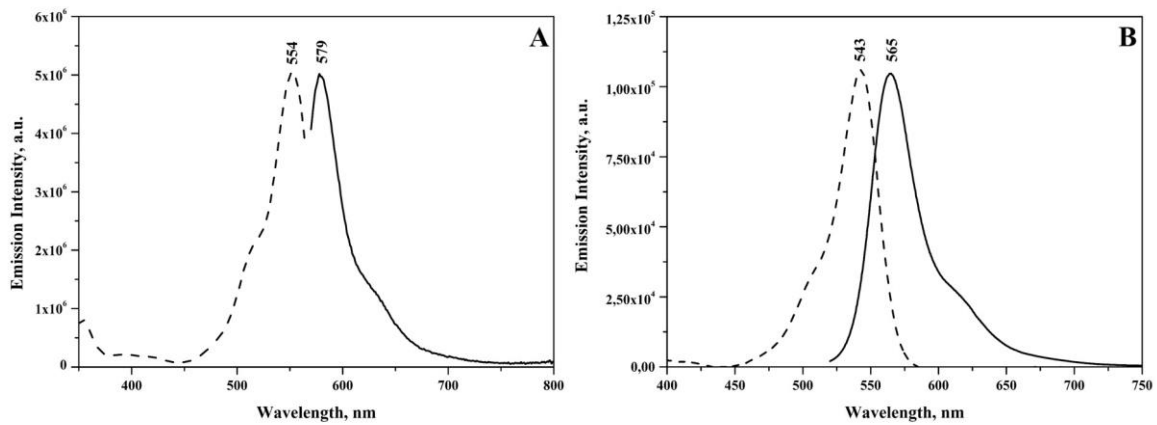

**Figure S5** – Excitation ( $\lambda_{em}= 590$  nm) and emission ( $\lambda_{exc}= 510$  nm) spectra of Rhodamine B in (A) water solution and (B) ethanol solution.

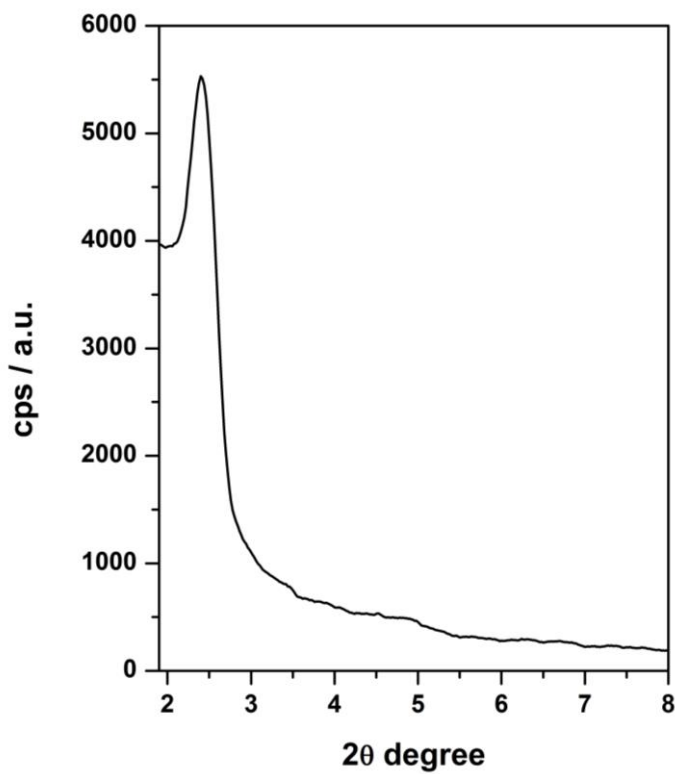

**Figure S6** – XRD pattern of Ver-RhB-10-in-MSNs sample

**Table S3** – Textural properties of Ver-RhB-10-in-MSNs

|                    | <b>SSA (m<sup>2</sup>g<sup>-1</sup>)</b> | <b>Pore Volume (cm<sup>3</sup> g<sup>-1</sup>)</b> |
|--------------------|------------------------------------------|----------------------------------------------------|
| RhB-10-in-MSNs     | 1235                                     | 1.072                                              |
| Ver-RhB-10-in-MSNs | 274                                      | 0.65                                               |
